# Supplementary material for: Mechanistically linked serum miRNAs distinguish between drug induced and fatty liver disease of different grades
Source: PubMed Central journal article supplement (PMC4820692; doi:10.1038/srep23709), 2016-04-05
Supplement: srep23709-s1.pdf [file srep23709-s1.pdf]

## SUPPORTING INFORMATION

### **Mechanistically linked serum miRNAs distinguish between drug induced and fatty liver disease of different grades**

Zhichao Liu<sup>1#</sup>, Yuping Wang<sup>1#</sup>, Jürgen Borlak<sup>2\*</sup> and Weida Tong<sup>1\*</sup>

<sup>1</sup> Division of Bioinformatics and Biostatistics, National Center for Toxicological Research, U.S. Food and Drug Administration, Jefferson, Arkansas, USA

<sup>2</sup> Centre for Pharmacology and Toxicology, Hannover Medical School, Hannover, Germany

<sup>#</sup> Equal contributors

### **SUPPLEMENTARY FIGURE AND TABLE LEGENDS**

**Supplementary Fig. S1.** Venn diagram of NAFLD regulated miRNAs based on computational prediction and miRTarBase queries

**Supplementary Table S1.** List of 200 genes considered to be mechanistically relevant in the process of lipid droplet biogenesis in hepatocytes as recently published by us <sup>17</sup>.

**Supplementary Table S2.** Summary of the 409 co-expressed miRNA-gene targets in DIS and NAFLD.

**Supplementary Table S3.** Drug, dose and time associations of co-expressed miRNA- gene targets in DIS.

## SUPPORTING INFORMATION

**Supplementary Table S4.** STRING analysis of protein-protein interactions after single and repeated drug treatment of rats with 17 steatotic drugs.

**Supplementary Table S5.** Results of 12 different computational algorithms to predicted miRNAs involved in DIS regulated genes.

miRNA predicted by  
12 in silico algorithms

miRNA obtained by  
mapping to miRTarBase

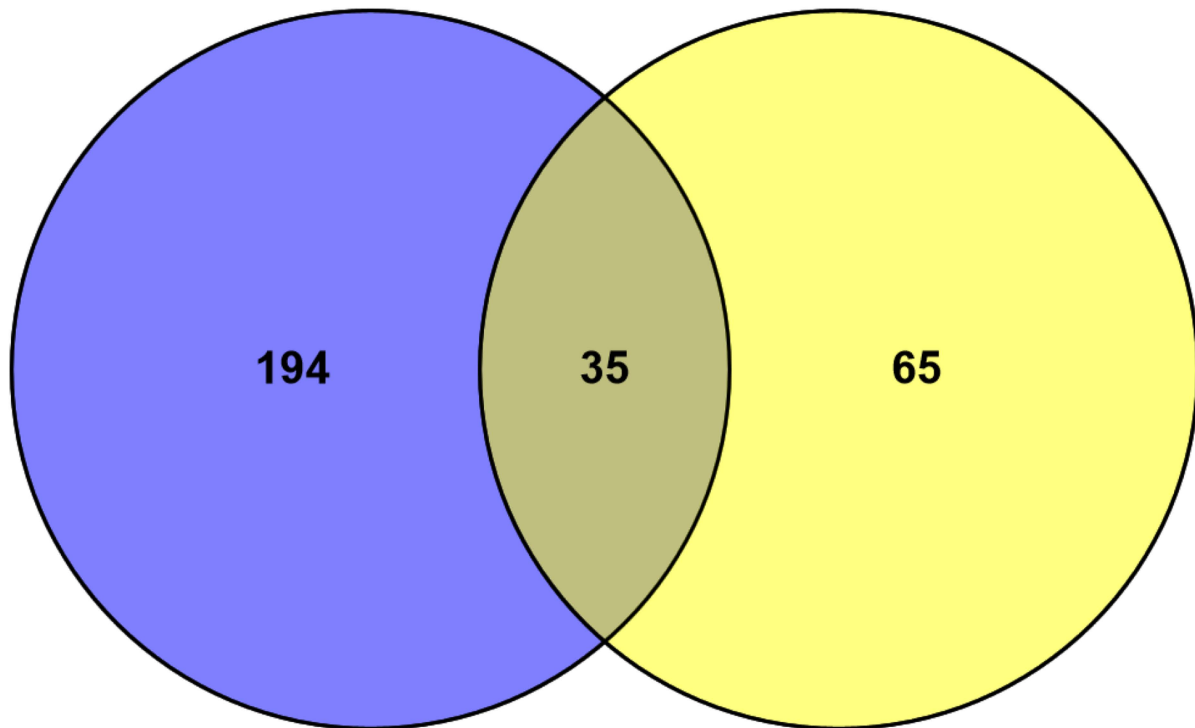

**Supplementary Table S1**

| <b>Gene Symbols</b> | <b>Related Mechanism</b> |
|---------------------|--------------------------|
| MTORC1              | Lipogenesis              |
| MTORC2              | Lipogenesis              |
| PPAP2               | Lipogenesis              |
| ACC1                | Lipogenesis              |
| ACAT1               | Lipogenesis              |
| ACAT2               | Lipogenesis              |
| ACLY                | Lipogenesis              |
| ANXA2               | Lipogenesis              |
| ANXA5               | Lipogenesis              |
| ANXA6               | Lipogenesis              |
| FAS                 | Lipogenesis              |
| CNR1                | Lipogenesis              |
| INSIG1              | Lipogenesis              |
| LCAT                | Lipogenesis              |
| FADS1               | Lipogenesis              |
| PPARG               | Lipogenesis              |
| RHEB                | Lipogenesis              |
| SCD1                | Lipogenesis              |
| SREBF1              | Lipogenesis              |
| TSC1                | Lipogenesis              |
| TSC2                | Lipogenesis              |
| UGCG                | Lipogenesis              |
| DHAP-AT             | Lipogenesis              |
| AGPS                | Lipogenesis              |
| DGAT1               | Lipogenesis              |
| FADS2               | Lipogenesis              |
| AGPAT1              | Lipogenesis              |
| AGPAT2              | Lipogenesis              |
| SPT1                | Lipogenesis              |
| SCAP                | Lipogenesis              |
| MLXIPL              | Lipogenesis              |
| INSIG2              | Lipogenesis              |
| ELOVL2              | Lipogenesis              |
| AGPAT5              | Lipogenesis              |
| AGPAT3              | Lipogenesis              |
| NCEH1               | Lipogenesis              |
| GPAT1               | Lipogenesis              |
| ELOVL5              | Lipogenesis              |
| ELOVL6              | Lipogenesis              |
| DGAT2               | Lipogenesis              |
| CREB3L3             | Lipogenesis              |
| GPAT3               | Lipogenesis              |
| GPAT2               | Lipogenesis              |
| S6K                 | Lipogenesis              |
| ELOVL3              | Lipogenesis              |

Zhichao Liu, Yuping Wang, Jürgen Borlak and Weida Tong: Mechanistically linked serum miRNAs distinguish between drug induced and fatty liver disease of different grades

|         |                      |
|---------|----------------------|
| CPT1    | Fatty acid oxidation |
| CPT2    | Fatty acid oxidation |
| ACSL1   | Fatty acid oxidation |
| FOXA2   | Fatty acid oxidation |
| MTP     | Fatty acid oxidation |
| PPARA   | Fatty acid oxidation |
| PPARB   | Fatty acid oxidation |
| FAF2    | Fatty acid oxidation |
| DERL1   | Fatty acid oxidation |
| ACSL3   | Fatty acid oxidation |
| PI3KC2G | Lipid transport      |
| THR     | Lipid transport      |
| ABCA1   | Lipid transport      |
| AHR     | Lipid transport      |
| AKT1    | Lipid transport      |
| AKT2    | Lipid transport      |
| CD36    | Lipid transport      |
| FABP1   | Lipid transport      |
| FABP6   | Lipid transport      |
| FABP7   | Lipid transport      |
| NR5A2   | Lipid transport      |
| LDLR    | Lipid transport      |
| RXRA    | Lipid transport      |
| RXRB    | Lipid transport      |
| RXRG    | Lipid transport      |
| NR1H2   | Lipid transport      |
| FXR     | Lipid transport      |
| NR1H3   | Lipid transport      |
| FATP5   | Lipid transport      |
| SLC27A5 | Lipid transport      |
| FATP2   | Lipid transport      |
| GSTA    | Bio-markers          |
| LAMA    | Bio-markers          |
| LAMB    | Bio-markers          |
| LAMC    | Bio-markers          |
| TXN1    | Bio-markers          |
| COL4A4  | Bio-markers          |
| COL4A6  | Bio-markers          |
| CRP     | Bio-markers          |
| GGT     | Bio-markers          |
| GLUD1   | Bio-markers          |
| GOT1    | Bio-markers          |
| GPT     | Bio-markers          |
| KRT18   | Bio-markers          |
| LDH     | Bio-markers          |
| TIMP1   | Bio-markers          |
| TXN2    | Bio-markers          |
| FGF21   | Bio-markers          |

|          | Bio-markers |
|----------|-------------|
| MIR122   |             |
| DNAHC    | LD proteins |
| KIF      | LD proteins |
| PKA      | LD proteins |
| RAB11    | LD proteins |
| SEC22    | LD proteins |
| PLIN2    | LD proteins |
| APOB     | LD proteins |
| APOE     | LD proteins |
| ARG1     | LD proteins |
| CAV1     | LD proteins |
| CAV2     | LD proteins |
| CES1     | LD proteins |
| DYNC1H1  | LD proteins |
| DYNC1I1  | LD proteins |
| PLD      | LD proteins |
| LIPE     | LD proteins |
| LPL      | LD proteins |
| NSF      | LD proteins |
| PLIN1    | LD proteins |
| PKD      | LD proteins |
| RAB5     | LD proteins |
| SNCG     | LD proteins |
| STX5     | LD proteins |
| VIM      | LD proteins |
| RAB7     | LD proteins |
| DYNLL1   | LD proteins |
| VAMP4    | LD proteins |
| SNAP23   | LD proteins |
| NAPA     | LD proteins |
| ATG5     | LD proteins |
| FLOT1    | LD proteins |
| PLIN3    | LD proteins |
| VTI1B    | LD proteins |
| ATG7     | LD proteins |
| ERLIN1   | LD proteins |
| RAB32    | LD proteins |
| ERLIN2   | LD proteins |
| MGLL     | LD proteins |
| RAB18    | LD proteins |
| HILPDA   | LD proteins |
| ABHD5    | LD proteins |
| ARFGAP1  | LD proteins |
| PNPLA2   | LD proteins |
| CIDEC    | LD proteins |
| DYNC2H1  | LD proteins |
| PNPLA3   | LD proteins |
| MAP1LC3B | LD proteins |

|            |                   |
|------------|-------------------|
| DNAAF1     | LD proteins       |
| FITM2      | LD proteins       |
| FITM1      | LD proteins       |
| PLIN5      | LD proteins       |
| SEC1       | LD proteins       |
| PLIN4      | LD proteins       |
| LY6C       | Signalling events |
| EIF-2ALPHA | Signalling events |
| CXCL2      | Signalling events |
| IL1        | Signalling events |
| IL6        | Signalling events |
| IL8        | Signalling events |
| IL10       | Signalling events |
| IL12       | Signalling events |
| IL17       | Signalling events |
| IL18       | Signalling events |
| NFKB1      | Signalling events |
| NOS2       | Signalling events |
| SERPINE1   | Signalling events |
| PRKAA1     | Signalling events |
| PRKAA2     | Signalling events |
| PRKAB1     | Signalling events |
| PRKAB2     | Signalling events |
| PRKAG1     | Signalling events |
| MAPK2      | Signalling events |
| MAPK1      | Signalling events |
| MAPK8      | Signalling events |
| MAPK9      | Signalling events |
| PTEN       | Signalling events |
| PTGER2     | Signalling events |
| NFKB3      | Signalling events |
| ROCK1      | Signalling events |
| CCL2       | Signalling events |
| STAT3      | Signalling events |
| STAT5      | Signalling events |
| TGFB1      | Signalling events |
| TGFB2      | Signalling events |
| TLR4       | Signalling events |
| TNFA       | Signalling events |
| SOCS1      | Signalling events |
| EIF-2GAMMA | Signalling events |
| SOCS2      | Signalling events |
| EIF-2BETA  | Signalling events |
| SOCS3      | Signalling events |
| ROCK2      | Signalling events |
| USP20      | Signalling events |
| USP33      | Signalling events |
| PRKAG2     | Signalling events |

|         |                    |
|---------|--------------------|
| PRKAG3  | Signalling events  |
| CCR2    | Signalling events  |
| CEBPA   | Glucose metabolism |
| FOXO1   | Glucose metabolism |
| GK      | Glucose metabolism |
| HNF4A   | Glucose metabolism |
| IRS1    | Glucose metabolism |
| PKLR    | Glucose metabolism |
| SLC2A1  | Glucose metabolism |
| IRS2    | Glucose metabolism |
| ANGPTL4 | Glucose metabolism |



**Supplementary Table S2**

| <b>DIS genes</b> | <b>miRNAs in miRTarBase</b> | <b>Mechanism</b>  | <b>77 unique genes</b> | <b>157 unique miRNAs</b> |
|------------------|-----------------------------|-------------------|------------------------|--------------------------|
| IL18             | hsa-miR-346                 | Signalling events | ABCA1                  | hsa-let-7a-5p            |
| IL6              | hsa-let-7a-5p               | Signalling events | ACAT1                  | hsa-let-7b-5p            |
| IL6              | hsa-miR-1                   | Signalling events | ACLY                   | hsa-let-7e-5p            |
| IL6              | hsa-miR-124-3p              | Signalling events | ACSL1                  | hsa-let-7i-5p            |
| IL6              | hsa-miR-155-5p              | Signalling events | ACSL3                  | hsa-miR-1                |
| IL6              | hsa-miR-26a-5p              | Signalling events | AGPAT2                 | hsa-miR-100-5p           |
| IL6              | hsa-miR-335-5p              | Signalling events | AGPAT3                 | hsa-miR-103a-3p          |
| IL6              | hsa-miR-365a-3p             | Signalling events | AHR                    | hsa-miR-106a-5p          |
| IL6              | hsa-miR-98-5p               | Signalling events | AKT1                   | hsa-miR-106b-3p          |
| MAPK1            | hsa-let-7b-5p               | Signalling events | AKT2                   | hsa-miR-106b-5p          |
| MAPK1            | hsa-miR-15b-5p              | Signalling events | ANGPTL4                | hsa-miR-107              |
| MAPK1            | hsa-miR-199a-3p             | Signalling events | ANXA2                  | hsa-miR-10a-3p           |
| MAPK1            | hsa-miR-28-5p               | Signalling events | ANXA5                  | hsa-miR-10a-5p           |
| MAPK1            | hsa-miR-30a-5p              | Signalling events | ANXA6                  | hsa-miR-10b-5p           |
| MAPK1            | hsa-miR-320a                | Signalling events | ARFGAP1                | hsa-miR-122-5p           |
| MAPK1            | hsa-miR-335-5p              | Signalling events | ARG1                   | hsa-miR-1226-3p          |
| MAPK1            | hsa-miR-766-3p              | Signalling events | ATG7                   | hsa-miR-1229-3p          |
| MAPK1            | hsa-miR-769-5p              | Signalling events | CAV1                   | hsa-miR-124-3p           |
| MAPK1            | hsa-miR-92b-3p              | Signalling events | CAV2                   | hsa-miR-125b-5p          |
| MAPK9            | hsa-miR-106b-5p             | Signalling events | CEBPA                  | hsa-miR-126-3p           |
| MAPK9            | hsa-miR-141-3p              | Signalling events | CPT2                   | hsa-miR-1260b            |
| MAPK9            | hsa-miR-17-5p               | Signalling events | DERL1                  | hsa-miR-128-3p           |
| MAPK9            | hsa-miR-192-5p              | Signalling events | DGAT1                  | hsa-miR-1280             |
| MAPK9            | hsa-miR-199a-3p             | Signalling events | DYNC1H1                | hsa-miR-1296-5p          |
| MAPK9            | hsa-miR-20a-5p              | Signalling events | DYNC2H1                | hsa-miR-1301-3p          |
| MAPK9            | hsa-miR-215-5p              | Signalling events | ELOVL2                 | hsa-miR-130a-3p          |
| MAPK9            | hsa-miR-27b-3p              | Signalling events | ELOVL5                 | hsa-miR-130b-3p          |
| MAPK9            | hsa-miR-7-5p                | Signalling events | ERLIN1                 | hsa-miR-132-3p           |
| MAPK9            | hsa-miR-92a-3p              | Signalling events | FABP7                  | hsa-miR-138-5p           |
| MAPK9            | hsa-miR-93-5p               | Signalling events | FADS1                  | hsa-miR-141-3p           |
| NFKB1            | hsa-let-7a-5p               | Signalling events | FADS2                  | hsa-miR-142-3p           |
| NFKB1            | hsa-miR-146a-5p             | Signalling events | FAS                    | hsa-miR-143-3p           |
| NFKB1            | hsa-miR-146b-5p             | Signalling events | FITM2                  | hsa-miR-144-3p           |
| NFKB1            | hsa-miR-155-5p              | Signalling events | FLOT1                  | hsa-miR-145-5p           |
| NFKB1            | hsa-miR-15a-5p              | Signalling events | FOXA2                  | hsa-miR-146a-5p          |
| NFKB1            | hsa-miR-16-5p               | Signalling events | FOXO1                  | hsa-miR-146b-5p          |
| NFKB1            | hsa-miR-21-5p               | Signalling events | GK                     | hsa-miR-148a-3p          |
| NFKB1            | hsa-miR-26b-5p              | Signalling events | GLUD1                  | hsa-miR-148b-3p          |
| NFKB1            | hsa-miR-9-5p                | Signalling events | GOT1                   | hsa-miR-149-3p           |
| NFKB1            | hsa-miR-92a-3p              | Signalling events | HNF4A                  | hsa-miR-149-5p           |
| NFKB1            | mmu-miR-210-3p              | Signalling events | IL18                   | hsa-miR-152-3p           |
| PRKAA1           | hsa-miR-128-3p              | Signalling events | IL6                    | hsa-miR-153-3p           |
| PRKAA1           | hsa-miR-130b-3p             | Signalling events | INSIG2                 | hsa-miR-155-5p           |
| PRKAA1           | hsa-miR-148b-3p             | Signalling events | IRS1                   | hsa-miR-15a-5p           |
| PRKAA1           | hsa-miR-19b-3p              | Signalling events | IRS2                   | hsa-miR-15b-5p           |
| PRKAA1           | hsa-miR-29b-3p              | Signalling events | LCAT                   | hsa-miR-16-5p            |
| PRKAA1           | hsa-miR-30a-5p              | Signalling events | LDLR                   | hsa-miR-17-3p            |
| PRKAA1           | hsa-miR-30e-5p              | Signalling events | MAPK1                  | hsa-miR-17-5p            |
| PRKAA1           | hsa-miR-652-3p              | Signalling events | MAPK9                  | hsa-miR-181b-5p          |
| PRKAA2           | hsa-let-7b-5p               | Signalling events | MGLL                   | hsa-miR-182-5p           |
| PRKAA2           | hsa-miR-182-5p              | Signalling events | NFKB1                  | hsa-miR-183-5p           |
| PRKAA2           | hsa-miR-192-5p              | Signalling events | NR1H3                  | hsa-miR-184              |
| PRKAA2           | hsa-miR-98-5p               | Signalling events | NR1H2                  | hsa-miR-185-5p           |
| PRKAB1           | hsa-miR-122-5p              | Signalling events | NR5A2                  | hsa-miR-186-5p           |
| PTEN             | hsa-miR-103a-3p             | Signalling events | NSF                    | hsa-miR-18a-3p           |
| PTEN             | hsa-miR-106b-5p             | Signalling events | PNPLA3                 | hsa-miR-18a-5p           |
| PTEN             | hsa-miR-107                 | Signalling events | PPARA                  | hsa-miR-191-5p           |
| PTEN             | hsa-miR-141-3p              | Signalling events | PPARG                  | hsa-miR-192-5p           |
| PTEN             | hsa-miR-144-3p              | Signalling events | PRKAA1                 | hsa-miR-193a-5p          |
| PTEN             | hsa-miR-17-5p               | Signalling events | PRKAA2                 | hsa-miR-193b-3p          |
| PTEN             | hsa-miR-181b-5p             | Signalling events | PRKAB1                 | hsa-miR-194-5p           |
| PTEN             | hsa-miR-18a-5p              | Signalling events | PTEN                   | hsa-miR-196a-5p          |
| PTEN             | hsa-miR-193b-3p             | Signalling events | RAB32                  | hsa-miR-197-3p           |
| PTEN             | hsa-miR-19a-3p              | Signalling events | ROCK1                  | hsa-miR-199a-3p          |
| PTEN             | hsa-miR-19b-3p              | Signalling events | ROCK2                  | hsa-miR-199a-5p          |
| PTEN             | hsa-miR-20a-5p              | Signalling events | SCAP                   | hsa-miR-19a-3p           |
| PTEN             | hsa-miR-21-5p               | Signalling events | SNAP23                 | hsa-miR-19b-3p           |
| PTEN             | hsa-miR-214-3p              | Signalling events | SOCS2                  | hsa-miR-203a             |
| PTEN             | hsa-miR-216a-5p             | Signalling events | SOCS3                  | hsa-miR-20a-5p           |
| PTEN             | hsa-miR-217                 | Signalling events | SREBF1                 | hsa-miR-20b-5p           |

|        |                 |                   |       |                 |
|--------|-----------------|-------------------|-------|-----------------|
| PTEN   | hsa-miR-221-3p  | Signalling events | STAT3 | hsa-miR-21-5p   |
| PTEN   | hsa-miR-222-3p  | Signalling events | STX5  | hsa-miR-214-3p  |
| PTEN   | hsa-miR-23a-3p  | Signalling events | TGFB1 | hsa-miR-215-5p  |
| PTEN   | hsa-miR-23b-3p  | Signalling events | TLR4  | hsa-miR-216a-5p |
| PTEN   | hsa-miR-26a-5p  | Signalling events | TSC2  | hsa-miR-217     |
| PTEN   | hsa-miR-29a-3p  | Signalling events | UGCG  | hsa-miR-22-3p   |
| PTEN   | hsa-miR-29b-3p  | Signalling events | VIM   | hsa-miR-221-3p  |
| PTEN   | hsa-miR-494-3p  | Signalling events |       | hsa-miR-222-3p  |
| PTEN   | hsa-miR-519a-3p | Signalling events |       | hsa-miR-223-3p  |
| PTEN   | hsa-miR-519c-3p | Signalling events |       | hsa-miR-23a-3p  |
| PTEN   | hsa-miR-519d-3p | Signalling events |       | hsa-miR-23b-3p  |
| PTEN   | hsa-miR-93-5p   | Signalling events |       | hsa-miR-24-3p   |
| ROCK1  | hsa-miR-1280    | Signalling events |       | hsa-miR-25-3p   |
| ROCK1  | hsa-miR-146a-5p | Signalling events |       | hsa-miR-26a-5p  |
| ROCK1  | hsa-miR-148b-3p | Signalling events |       | hsa-miR-26b-3p  |
| ROCK1  | hsa-miR-584-5p  | Signalling events |       | hsa-miR-26b-5p  |
| ROCK2  | hsa-miR-124-3p  | Signalling events |       | hsa-miR-27a-3p  |
| ROCK2  | hsa-miR-138-5p  | Signalling events |       | hsa-miR-27b-3p  |
| SOCS2  | hsa-miR-16-5p   | Signalling events |       | hsa-miR-28-5p   |
| SOCS2  | hsa-miR-194-5p  | Signalling events |       | hsa-miR-296-3p  |
| SOCS2  | hsa-miR-7-5p    | Signalling events |       | hsa-miR-29a-3p  |
| SOCS3  | hsa-miR-203a    | Signalling events |       | hsa-miR-29b-3p  |
| SOCS3  | hsa-miR-30c-5p  | Signalling events |       | hsa-miR-302a-3p |
| STAT3  | hsa-let-7e-5p   | Signalling events |       | hsa-miR-302b-3p |
| STAT3  | hsa-miR-125b-5p | Signalling events |       | hsa-miR-302c-3p |
| STAT3  | hsa-miR-155-5p  | Signalling events |       | hsa-miR-302d-3p |
| STAT3  | hsa-miR-20a-5p  | Signalling events |       | hsa-miR-30a-5p  |
| STAT3  | hsa-miR-20b-5p  | Signalling events |       | hsa-miR-30c-5p  |
| STAT3  | hsa-miR-21-5p   | Signalling events |       | hsa-miR-30e-5p  |
| STAT3  | hsa-miR-337-3p  | Signalling events |       | hsa-miR-320a    |
| STAT3  | hsa-miR-92a-3p  | Signalling events |       | hsa-miR-320b    |
| STAT3  | hsa-miR-93-5p   | Signalling events |       | hsa-miR-320c    |
| TGFB1  | hsa-miR-21-5p   | Signalling events |       | hsa-miR-324-3p  |
| TGFB1  | hsa-miR-24-3p   | Signalling events |       | hsa-miR-324-5p  |
| TGFB1  | hsa-miR-633     | Signalling events |       | hsa-miR-330-5p  |
| TGFB1  | hsa-miR-744-5p  | Signalling events |       | hsa-miR-331-3p  |
| TLR4   | hsa-let-7i-5p   | Signalling events |       | hsa-miR-335-5p  |
| TLR4   | hsa-miR-1       | Signalling events |       | hsa-miR-337-3p  |
| TLR4   | hsa-miR-146a-5p | Signalling events |       | hsa-miR-33a-5p  |
| TLR4   | hsa-miR-21-5p   | Signalling events |       | hsa-miR-33b-5p  |
| TLR4   | hsa-miR-335-5p  | Signalling events |       | hsa-miR-340-5p  |
| ACAT1  | hsa-miR-1260b   | Lipogenesis       |       | hsa-miR-346     |
| ACAT1  | hsa-miR-21-5p   | Lipogenesis       |       | hsa-miR-34a-5p  |
| ACAT1  | hsa-miR-23b-3p  | Lipogenesis       |       | hsa-miR-34b-5p  |
| ACLY   | hsa-miR-10a-3p  | Lipogenesis       |       | hsa-miR-34c-5p  |
| ACLY   | hsa-miR-10b-5p  | Lipogenesis       |       | hsa-miR-3605-3p |
| ACLY   | hsa-miR-1229-3p | Lipogenesis       |       | hsa-miR-361-5p  |
| ACLY   | hsa-miR-125b-5p | Lipogenesis       |       | hsa-miR-365a-3p |
| ACLY   | hsa-miR-149-5p  | Lipogenesis       |       | hsa-miR-373-3p  |
| ACLY   | hsa-miR-18a-3p  | Lipogenesis       |       | hsa-miR-374b-5p |
| ACLY   | hsa-miR-320b    | Lipogenesis       |       | hsa-miR-375     |
| ACLY   | hsa-miR-324-3p  | Lipogenesis       |       | hsa-miR-378a-3p |
| ACLY   | hsa-miR-361-5p  | Lipogenesis       |       | hsa-miR-423-3p  |
| ACLY   | hsa-miR-484     | Lipogenesis       |       | hsa-miR-449a    |
| ACLY   | hsa-miR-769-3p  | Lipogenesis       |       | hsa-miR-451a    |
| ACLY   | hsa-miR-877-3p  | Lipogenesis       |       | hsa-miR-455-3p  |
| ACLY   | hsa-miR-92a-3p  | Lipogenesis       |       | hsa-miR-484     |
| ACLY   | hsa-miR-93-3p   | Lipogenesis       |       | hsa-miR-494-3p  |
| AGPAT2 | hsa-miR-744-5p  | Lipogenesis       |       | hsa-miR-500a-3p |
| AGPAT3 | hsa-miR-100-5p  | Lipogenesis       |       | hsa-miR-504-5p  |
| AGPAT3 | hsa-miR-149-5p  | Lipogenesis       |       | hsa-miR-519a-3p |
| AGPAT3 | hsa-miR-18a-3p  | Lipogenesis       |       | hsa-miR-519c-3p |
| AGPAT3 | hsa-miR-24-3p   | Lipogenesis       |       | hsa-miR-519d-3p |
| AGPAT3 | hsa-miR-26b-5p  | Lipogenesis       |       | hsa-miR-584-5p  |
| AGPAT3 | hsa-miR-335-5p  | Lipogenesis       |       | hsa-miR-613     |
| AGPAT3 | hsa-miR-744-5p  | Lipogenesis       |       | hsa-miR-615-3p  |
| ANXA2  | hsa-miR-1       | Lipogenesis       |       | hsa-miR-625-5p  |
| ANXA2  | hsa-miR-132-3p  | Lipogenesis       |       | hsa-miR-629-5p  |
| ANXA2  | hsa-miR-155-5p  | Lipogenesis       |       | hsa-miR-633     |
| ANXA2  | hsa-miR-769-3p  | Lipogenesis       |       | hsa-miR-652-3p  |
| ANXA5  | hsa-miR-124-3p  | Lipogenesis       |       | hsa-miR-7-5p    |
| ANXA5  | hsa-miR-26b-5p  | Lipogenesis       |       | hsa-miR-708-5p  |
| ANXA5  | hsa-miR-330-5p  | Lipogenesis       |       | hsa-miR-744-5p  |

|        |                 |                 |                |
|--------|-----------------|-----------------|----------------|
| ANXA6  | hsa-miR-124-3p  | Lipogenesis     | hsa-miR-765    |
| ANXA6  | hsa-miR-324-5p  | Lipogenesis     | hsa-miR-766-3p |
| ANXA6  | hsa-miR-877-3p  | Lipogenesis     | hsa-miR-769-3p |
| DGAT1  | hsa-miR-125b-5p | Lipogenesis     | hsa-miR-769-5p |
| DGAT1  | hsa-miR-183-5p  | Lipogenesis     | hsa-miR-877-3p |
| DGAT1  | hsa-miR-26b-5p  | Lipogenesis     | hsa-miR-9-5p   |
| DGAT1  | hsa-miR-484     | Lipogenesis     | hsa-miR-92a-3p |
| ELOVL2 | hsa-miR-10a-5p  | Lipogenesis     | hsa-miR-92b-3p |
| ELOVL2 | hsa-miR-17-3p   | Lipogenesis     | hsa-miR-93-3p  |
| ELOVL2 | hsa-miR-26b-5p  | Lipogenesis     | hsa-miR-93-5p  |
| ELOVL5 | hsa-miR-124-3p  | Lipogenesis     | hsa-miR-96-5p  |
| ELOVL5 | hsa-miR-16-5p   | Lipogenesis     | hsa-miR-98-5p  |
| ELOVL5 | hsa-miR-192-5p  | Lipogenesis     | hsa-miR-99a-5p |
| ELOVL5 | hsa-miR-19b-3p  | Lipogenesis     | hsa-miR-210-3p |
| ELOVL5 | hsa-miR-215-5p  | Lipogenesis     |                |
| ELOVL5 | hsa-miR-30a-5p  | Lipogenesis     |                |
| ELOVL5 | hsa-miR-324-5p  | Lipogenesis     |                |
| FADS1  | hsa-miR-1       | Lipogenesis     |                |
| FADS1  | hsa-miR-155-5p  | Lipogenesis     |                |
| FADS1  | hsa-miR-192-5p  | Lipogenesis     |                |
| FADS1  | hsa-miR-215-5p  | Lipogenesis     |                |
| FADS1  | hsa-miR-335-5p  | Lipogenesis     |                |
| FADS2  | hsa-let-7b-5p   | Lipogenesis     |                |
| FADS2  | hsa-miR-18a-3p  | Lipogenesis     |                |
| FADS2  | hsa-miR-26b-5p  | Lipogenesis     |                |
| FADS2  | hsa-miR-324-3p  | Lipogenesis     |                |
| FADS2  | hsa-miR-335-5p  | Lipogenesis     |                |
| FADS2  | hsa-miR-423-3p  | Lipogenesis     |                |
| FADS2  | hsa-miR-500a-3p | Lipogenesis     |                |
| FAS    | hsa-miR-106a-5p | Lipogenesis     |                |
| FAS    | hsa-miR-146a-5p | Lipogenesis     |                |
| FAS    | hsa-miR-21-5p   | Lipogenesis     |                |
| FAS    | hsa-miR-504-5p  | Lipogenesis     |                |
| FAS    | hsa-miR-98-5p   | Lipogenesis     |                |
| INSIG2 | hsa-miR-142-3p  | Lipogenesis     |                |
| INSIG2 | hsa-miR-335-5p  | Lipogenesis     |                |
| INSIG2 | hsa-miR-373-3p  | Lipogenesis     |                |
| INSIG2 | hsa-miR-375     | Lipogenesis     |                |
| LCAT   | hsa-miR-26b-5p  | Lipogenesis     |                |
| PPARG  | hsa-miR-1       | Lipogenesis     |                |
| PPARG  | hsa-miR-130a-3p | Lipogenesis     |                |
| PPARG  | hsa-miR-130b-3p | Lipogenesis     |                |
| PPARG  | hsa-miR-138-5p  | Lipogenesis     |                |
| PPARG  | hsa-miR-192-5p  | Lipogenesis     |                |
| PPARG  | hsa-miR-20b-5p  | Lipogenesis     |                |
| PPARG  | hsa-miR-215-5p  | Lipogenesis     |                |
| PPARG  | hsa-miR-27b-3p  | Lipogenesis     |                |
| SCAP   | hsa-miR-10a-5p  | Lipogenesis     |                |
| SCAP   | hsa-miR-181b-5p | Lipogenesis     |                |
| SCAP   | hsa-miR-484     | Lipogenesis     |                |
| SCAP   | hsa-miR-93-3p   | Lipogenesis     |                |
| SREBF1 | hsa-let-7e-5p   | Lipogenesis     |                |
| SREBF1 | hsa-miR-10a-5p  | Lipogenesis     |                |
| SREBF1 | hsa-miR-185-5p  | Lipogenesis     |                |
| SREBF1 | hsa-miR-25-3p   | Lipogenesis     |                |
| SREBF1 | hsa-miR-335-5p  | Lipogenesis     |                |
| SREBF1 | hsa-miR-378a-3p | Lipogenesis     |                |
| SREBF1 | hsa-miR-484     | Lipogenesis     |                |
| SREBF1 | hsa-miR-744-5p  | Lipogenesis     |                |
| SREBF1 | hsa-miR-93-3p   | Lipogenesis     |                |
| TSC2   | hsa-miR-17-5p   | Lipogenesis     |                |
| TSC2   | hsa-miR-296-3p  | Lipogenesis     |                |
| TSC2   | hsa-miR-744-5p  | Lipogenesis     |                |
| UGCG   | hsa-miR-335-5p  | Lipogenesis     |                |
| UGCG   | hsa-miR-375     | Lipogenesis     |                |
| ABCA1  | hsa-miR-19a-3p  | Lipid transport |                |
| ABCA1  | hsa-miR-26a-5p  | Lipid transport |                |
| ABCA1  | hsa-miR-26b-5p  | Lipid transport |                |
| ABCA1  | hsa-miR-27a-3p  | Lipid transport |                |
| ABCA1  | hsa-miR-33a-5p  | Lipid transport |                |
| ABCA1  | hsa-miR-33b-5p  | Lipid transport |                |
| AHR    | hsa-miR-124-3p  | Lipid transport |                |
| AHR    | hsa-miR-130b-3p | Lipid transport |                |

|         |                 |                 |
|---------|-----------------|-----------------|
| AHR     | hsa-miR-26a-5p  | Lipid transport |
| AHR     | hsa-miR-625-5p  | Lipid transport |
| AHR     | hsa-miR-98-5p   | Lipid transport |
| AKT1    | hsa-miR-125b-5p | Lipid transport |
| AKT1    | hsa-miR-143-3p  | Lipid transport |
| AKT1    | hsa-miR-149-3p  | Lipid transport |
| AKT1    | hsa-miR-185-5p  | Lipid transport |
| AKT1    | hsa-miR-193b-3p | Lipid transport |
| AKT1    | hsa-miR-26b-5p  | Lipid transport |
| AKT1    | hsa-miR-302a-3p | Lipid transport |
| AKT1    | hsa-miR-302b-3p | Lipid transport |
| AKT1    | hsa-miR-302c-3p | Lipid transport |
| AKT1    | hsa-miR-302d-3p | Lipid transport |
| AKT1    | hsa-miR-451a    | Lipid transport |
| AKT2    | hsa-miR-124-3p  | Lipid transport |
| AKT2    | hsa-miR-1296-5p | Lipid transport |
| AKT2    | hsa-miR-149-5p  | Lipid transport |
| AKT2    | hsa-miR-184     | Lipid transport |
| AKT2    | hsa-miR-21-5p   | Lipid transport |
| AKT2    | hsa-miR-423-3p  | Lipid transport |
| AKT2    | hsa-miR-708-5p  | Lipid transport |
| AKT2    | hsa-miR-744-5p  | Lipid transport |
| AKT2    | hsa-miR-877-3p  | Lipid transport |
| FABP7   | hsa-miR-132-3p  | Lipid transport |
| LDLR    | hsa-let-7b-5p   | Lipid transport |
| LDLR    | hsa-miR-124-3p  | Lipid transport |
| LDLR    | hsa-miR-128-3p  | Lipid transport |
| LDLR    | hsa-miR-130a-3p | Lipid transport |
| LDLR    | hsa-miR-130b-3p | Lipid transport |
| LDLR    | hsa-miR-149-5p  | Lipid transport |
| LDLR    | hsa-miR-19b-3p  | Lipid transport |
| LDLR    | hsa-miR-26b-3p  | Lipid transport |
| LDLR    | hsa-miR-30a-5p  | Lipid transport |
| LDLR    | hsa-miR-335-5p  | Lipid transport |
| LDLR    | hsa-miR-744-5p  | Lipid transport |
| LDLR    | hsa-miR-92a-3p  | Lipid transport |
| LDLR    | hsa-miR-92b-3p  | Lipid transport |
| LDLR    | hsa-miR-93-5p   | Lipid transport |
| NR1H3   | hsa-miR-613     | Lipid transport |
| NR1I2   | hsa-let-7a-5p   | Lipid transport |
| NR1I2   | hsa-miR-148a-3p | Lipid transport |
| NR1I2   | hsa-miR-16-5p   | Lipid transport |
| NR1I2   | hsa-miR-615-3p  | Lipid transport |
| NR5A2   | hsa-miR-1       | Lipid transport |
| ARFGAP1 | hsa-miR-30c-5p  | LD proteins     |
| ARFGAP1 | hsa-miR-423-3p  | LD proteins     |
| ARFGAP1 | hsa-miR-93-3p   | LD proteins     |
| ARG1    | hsa-miR-1       | LD proteins     |
| ARG1    | hsa-miR-30a-5p  | LD proteins     |
| ARG1    | hsa-miR-7-5p    | LD proteins     |
| ATG7    | hsa-miR-320c    | LD proteins     |
| ATG7    | hsa-miR-375     | LD proteins     |
| CAV1    | hsa-miR-103a-3p | LD proteins     |
| CAV1    | hsa-miR-124-3p  | LD proteins     |
| CAV1    | hsa-miR-199a-5p | LD proteins     |
| CAV1    | hsa-miR-26b-5p  | LD proteins     |
| CAV1    | hsa-miR-34b-5p  | LD proteins     |
| CAV1    | hsa-miR-34c-5p  | LD proteins     |
| CAV1    | hsa-miR-7-5p    | LD proteins     |
| CAV2    | hsa-miR-199a-3p | LD proteins     |
| CAV2    | hsa-miR-26b-5p  | LD proteins     |
| CAV2    | hsa-miR-93-5p   | LD proteins     |
| DYNC1H1 | hsa-let-7b-5p   | LD proteins     |
| DYNC1H1 | hsa-miR-122-5p  | LD proteins     |
| DYNC1H1 | hsa-miR-149-5p  | LD proteins     |
| DYNC1H1 | hsa-miR-221-3p  | LD proteins     |
| DYNC1H1 | hsa-miR-455-3p  | LD proteins     |
| DYNC1H1 | hsa-miR-615-3p  | LD proteins     |
| DYNC1H1 | hsa-miR-92a-3p  | LD proteins     |
| DYNC1H1 | hsa-miR-96-5p   | LD proteins     |
| DYNC2H1 | hsa-let-7a-5p   | LD proteins     |
| DYNC2H1 | hsa-miR-124-3p  | LD proteins     |
| DYNC2H1 | hsa-miR-125b-5p | LD proteins     |

|         |                 |                    |
|---------|-----------------|--------------------|
| DYNC2H1 | hsa-miR-155-5p  | LD proteins        |
| DYNC2H1 | hsa-miR-331-3p  | LD proteins        |
| ERLIN1  | hsa-miR-10a-5p  | LD proteins        |
| ERLIN1  | hsa-miR-10b-5p  | LD proteins        |
| ERLIN1  | hsa-miR-17-5p   | LD proteins        |
| ERLIN1  | hsa-miR-30a-5p  | LD proteins        |
| ERLIN1  | hsa-miR-30c-5p  | LD proteins        |
| ERLIN1  | hsa-miR-34a-5p  | LD proteins        |
| ERLIN1  | hsa-miR-615-3p  | LD proteins        |
| FITM2   | hsa-miR-373-3p  | LD proteins        |
| FLOT1   | hsa-miR-182-5p  | LD proteins        |
| FLOT1   | hsa-miR-214-3p  | LD proteins        |
| FLOT1   | hsa-miR-320a    | LD proteins        |
| FLOT1   | hsa-miR-484     | LD proteins        |
| MGLL    | hsa-miR-30c-5p  | LD proteins        |
| MGLL    | hsa-miR-7-5p    | LD proteins        |
| NSF     | hsa-miR-100-5p  | LD proteins        |
| NSF     | hsa-miR-103a-3p | LD proteins        |
| NSF     | hsa-miR-16-5p   | LD proteins        |
| NSF     | hsa-miR-192-5p  | LD proteins        |
| NSF     | hsa-miR-193b-3p | LD proteins        |
| NSF     | hsa-miR-215-5p  | LD proteins        |
| NSF     | hsa-miR-26b-5p  | LD proteins        |
| NSF     | hsa-miR-877-3p  | LD proteins        |
| PNPLA3  | hsa-miR-335-5p  | LD proteins        |
| RAB32   | hsa-miR-124-3p  | LD proteins        |
| RAB32   | hsa-miR-26b-5p  | LD proteins        |
| SNAP23  | hsa-let-7b-5p   | LD proteins        |
| SNAP23  | hsa-miR-124-3p  | LD proteins        |
| SNAP23  | hsa-miR-34a-5p  | LD proteins        |
| SNAP23  | hsa-miR-98-5p   | LD proteins        |
| STX5    | hsa-miR-155-5p  | LD proteins        |
| VIM     | hsa-miR-124-3p  | LD proteins        |
| VIM     | hsa-miR-1301-3p | LD proteins        |
| VIM     | hsa-miR-138-5p  | LD proteins        |
| VIM     | hsa-miR-16-5p   | LD proteins        |
| VIM     | hsa-miR-17-3p   | LD proteins        |
| VIM     | hsa-miR-26b-5p  | LD proteins        |
| VIM     | hsa-miR-30a-5p  | LD proteins        |
| VIM     | hsa-miR-30c-5p  | LD proteins        |
| VIM     | hsa-miR-3605-3p | LD proteins        |
| VIM     | hsa-miR-615-3p  | LD proteins        |
| VIM     | hsa-miR-9-5p    | LD proteins        |
| ANGPTL4 | hsa-miR-1       | Glucose metabolism |
| ANGPTL4 | hsa-miR-124-3p  | Glucose metabolism |
| CEBPA   | hsa-miR-1       | Glucose metabolism |
| CEBPA   | hsa-miR-1226-3p | Glucose metabolism |
| CEBPA   | hsa-miR-124-3p  | Glucose metabolism |
| CEBPA   | hsa-miR-125b-5p | Glucose metabolism |
| CEBPA   | hsa-miR-138-5p  | Glucose metabolism |
| CEBPA   | hsa-miR-193a-5p | Glucose metabolism |
| CEBPA   | hsa-miR-744-5p  | Glucose metabolism |
| FOXO1   | hsa-miR-106b-3p | Glucose metabolism |
| FOXO1   | hsa-miR-132-3p  | Glucose metabolism |
| FOXO1   | hsa-miR-153-3p  | Glucose metabolism |
| FOXO1   | hsa-miR-15a-5p  | Glucose metabolism |
| FOXO1   | hsa-miR-182-5p  | Glucose metabolism |
| FOXO1   | hsa-miR-183-5p  | Glucose metabolism |
| FOXO1   | hsa-miR-186-5p  | Glucose metabolism |
| FOXO1   | hsa-miR-196a-5p | Glucose metabolism |
| FOXO1   | hsa-miR-223-3p  | Glucose metabolism |
| FOXO1   | hsa-miR-27a-3p  | Glucose metabolism |
| FOXO1   | hsa-miR-335-5p  | Glucose metabolism |
| FOXO1   | hsa-miR-9-5p    | Glucose metabolism |
| FOXO1   | hsa-miR-96-5p   | Glucose metabolism |
| FOXO1   | hsa-miR-98-5p   | Glucose metabolism |
| GK      | hsa-miR-10b-5p  | Glucose metabolism |
| GK      | hsa-miR-132-3p  | Glucose metabolism |
| HNF4A   | hsa-miR-197-3p  | Glucose metabolism |
| HNF4A   | hsa-miR-24-3p   | Glucose metabolism |
| HNF4A   | hsa-miR-34a-5p  | Glucose metabolism |
| HNF4A   | hsa-miR-34b-5p  | Glucose metabolism |
| HNF4A   | hsa-miR-34c-5p  | Glucose metabolism |

|       |                 |                      |
|-------|-----------------|----------------------|
| HNF4A | hsa-miR-449a    | Glucose metabolism   |
| HNF4A | hsa-miR-629-5p  | Glucose metabolism   |
| HNF4A | hsa-miR-765     | Glucose metabolism   |
| HNF4A | hsa-miR-766-3p  | Glucose metabolism   |
| IRS1  | hsa-miR-126-3p  | Glucose metabolism   |
| IRS1  | hsa-miR-145-5p  | Glucose metabolism   |
| IRS1  | hsa-miR-148a-3p | Glucose metabolism   |
| IRS1  | hsa-miR-152-3p  | Glucose metabolism   |
| IRS1  | hsa-miR-7-5p    | Glucose metabolism   |
| IRS2  | hsa-let-7b-5p   | Glucose metabolism   |
| IRS2  | hsa-let-7e-5p   | Glucose metabolism   |
| IRS2  | hsa-miR-145-5p  | Glucose metabolism   |
| IRS2  | hsa-miR-33a-5p  | Glucose metabolism   |
| IRS2  | hsa-miR-374b-5p | Glucose metabolism   |
| IRS2  | hsa-miR-484     | Glucose metabolism   |
| IRS2  | hsa-miR-7-5p    | Glucose metabolism   |
| IRS2  | hsa-miR-98-5p   | Glucose metabolism   |
| ACSL1 | hsa-let-7b-5p   | Fatty acid oxidation |
| ACSL1 | hsa-miR-191-5p  | Fatty acid oxidation |
| ACSL1 | hsa-miR-192-5p  | Fatty acid oxidation |
| ACSL1 | hsa-miR-335-5p  | Fatty acid oxidation |
| ACSL1 | hsa-miR-34a-5p  | Fatty acid oxidation |
| ACSL1 | hsa-miR-93-3p   | Fatty acid oxidation |
| ACSL3 | hsa-miR-100-5p  | Fatty acid oxidation |
| ACSL3 | hsa-miR-221-3p  | Fatty acid oxidation |
| ACSL3 | hsa-miR-335-5p  | Fatty acid oxidation |
| ACSL3 | hsa-miR-340-5p  | Fatty acid oxidation |
| ACSL3 | hsa-miR-375     | Fatty acid oxidation |
| CPT2  | hsa-miR-34a-5p  | Fatty acid oxidation |
| CPT2  | hsa-miR-378a-3p | Fatty acid oxidation |
| DERL1 | hsa-miR-19b-3p  | Fatty acid oxidation |
| DERL1 | hsa-miR-21-5p   | Fatty acid oxidation |
| DERL1 | hsa-miR-26b-5p  | Fatty acid oxidation |
| DERL1 | hsa-miR-30a-5p  | Fatty acid oxidation |
| FOXA2 | hsa-miR-335-5p  | Fatty acid oxidation |
| PPARA | hsa-miR-10b-5p  | Fatty acid oxidation |
| PPARA | hsa-miR-124-3p  | Fatty acid oxidation |
| PPARA | hsa-miR-141-3p  | Fatty acid oxidation |
| PPARA | hsa-miR-21-5p   | Fatty acid oxidation |
| PPARA | hsa-miR-22-3p   | Fatty acid oxidation |
| PPARA | hsa-miR-335-5p  | Fatty acid oxidation |
| PPARA | hsa-miR-519d-3p | Fatty acid oxidation |
| GLUD1 | hsa-miR-185-5p  | Bio-markers          |
| GLUD1 | hsa-miR-193b-3p | Bio-markers          |
| GLUD1 | hsa-miR-93-3p   | Bio-markers          |
| GLUD1 | hsa-miR-99a-5p  | Bio-markers          |
| GOT1  | hsa-miR-769-5p  | Bio-markers          |
